# Supplementary material
Source: publisher figshare collection journal article supplement (https://karger.figshare.com/articles/dataset/_/5701864)
Supplement: Supplementary file 1 [file 1]

Archive with 11 entries (11 files):
- 485262sm_10.pdf
- 485262sm_11.tif
- 485262sm_1.pdf
- 485262sm_3.pdf
- 485262sm_2.pdf
- 485262sm_6.pdf
- 485262sm_8.pdf
- 485262sm_5.pdf
- 485262sm_4.pdf
- 485262sm_9.pdf
- 485262sm_7.pdf
