# Supplementary material
Source: publisher figshare collection journal article supplement (https://karger.figshare.com/articles/dataset/_/5701864)
Supplement: Supplementary file 1 [file 1 › 485262sm_5.pdf]

## Supplementary References

1. Molina-Prat N, Adán a M, Mesquida M, Pelegrini L, Rey A, Alvarez G. [Vitreotomy surgery for the treatment of the vitreo-retinal complications of the pars planitis]. *Arch Soc Esp Oftalmol*. 2010;85:333–6.
2. Quinones K, Choi JY, Yilmaz T, Kafkala C, Letko E, Foster CS. Pars plana vitrectomy versus immunomodulatory therapy for intermediate uveitis: a prospective, randomized pilot study. *Ocul Immunol Inflamm*. 2010;18:411–7.
3. Figueroa MS, Noval S, Contreras I, Arruabarrena C, García-Pérez JL, Sales M, et al. [Pars plana vitrectomy as anti-inflammatory therapy for intermediate uveitis in children]. *Arch Soc Esp Oftalmol*. 2010;85:390–4.
4. Nussenblatt RB, Palestine AG. *Uveitis: Fundamentals and Clinical Practice*, First Edition. Year Book Medical Publishers, INC; 1989.
5. Nussenblatt RB, Palestine AG, Chan CC, Roberge F. Standardization of vitreal inflammatory activity in intermediate and posterior uveitis. *Ophthalmology*. 1985;92:467–71.
6. Jabs DA, Nussenblatt RB, Rosenbaum JT. Standardization of uveitis nomenclature for reporting clinical data. Results of the First International Workshop. *Am J Ophthalmol*. 2005 Sep;140(3):509–16.
