# Supplementary material
Source: publisher figshare collection journal article supplement (https://karger.figshare.com/articles/dataset/_/5701864)
Supplement: Supplementary file 1 [file 1 › 485262sm_6.pdf]

**Table S1:** Worst corrected visual acuity and inflammatory signs recorded during follow-up in three affected eyes of two patients from a cohort of children and adolescents with non-infectious intermediate uveitis that received no treatment.

|                                  | Patient 13, right eye | Patient 13, left eye | Patient 14, right eye |
|----------------------------------|-----------------------|----------------------|-----------------------|
| Total follow-up (years)          | 1.0                   | 1.0                  | 6.2                   |
| Corrected visual acuity (LogMAR) | 0                     | 0.05                 | 0                     |
| Cells in anterior chamber        | 0                     | 0.5+                 | 0.5+                  |
| Vitreous haze                    | 0.5+                  | 0.5+                 | 1+                    |
| Snowballs                        | Yes                   | Yes                  | Yes                   |
| Snowbanks                        | No                    | No                   | Yes                   |
| Peripheral vasculitis            | No                    | No                   | No                    |
| Papillitis                       | No                    | No                   | No                    |
| Cystic macular edema             | No                    | No                   | No                    |
