# Supplementary material
Source: publisher figshare collection journal article supplement (https://karger.figshare.com/articles/dataset/_/5701864)
Supplement: Supplementary file 1 [file 1 › 485262sm_7.pdf]

**Table S2:** Influence in the rate of inflammatory relapse of the treatment used in remission induction, in a cohort of children and adolescents with non-infectious intermediate uveitis that received no treatment.

|                            | HR [95% CI]      | p-value |
|----------------------------|------------------|---------|
| Immunosuppressive drugs    | 0.37 [0.10-1.42] | 0.15    |
| Systemic corticosteroids*  | -                | -       |
| Periocular corticosteroids | 0.48 [0.10-4.60] | 0.53    |

HR: Hazard ratio; CI: Confidence interval. \* Only 2 events in a time at risk of 0.6 eye-years.
