# Supplementary material
Source: publisher figshare collection journal article supplement (https://karger.figshare.com/articles/dataset/_/5701864)
Supplement: Supplementary file 1 [file 1 › 485262sm_8.pdf]

**Table S3:** Treatments prescribed to the patients with bilateral disease from a cohort of children and adolescents with IU.

| Patient | Number of periocular corticosteroids injections |          | Topical corticosteroids | Systemic corticosteroids | ISDs |
|---------|-------------------------------------------------|----------|-------------------------|--------------------------|------|
|         | Right eye                                       | Left eye |                         |                          |      |
| 1       | 0                                               | 0        | Right eye               | Yes                      | No   |
| 2       | 2                                               | 2        | Left eye                | Yes                      | Yes  |
| 3       | 2                                               | 3        | Both                    | Yes                      | Yes  |
| 4       | 0                                               | 3        | Both                    | Yes                      | Yes  |
| 5       | 0                                               | 5        | Both                    | Yes                      | Yes  |
| 6       | 0                                               | 7        | Both                    | Yes                      | Yes  |
| 7       | 0                                               | 1        | No                      | Yes                      | No   |
| 8       | 0                                               | 2        | Both                    | Yes                      | No   |
| 9       | 3                                               | 0        | Right eye               | No                       | No   |
| 10      | 6                                               | 0        | No                      | No                       | No   |
| 11      | 0                                               | 5        | No                      | No                       | No   |
| 12      | 0                                               | 1        | Both                    | No                       | No   |
| 13      | 0                                               | 0        | No                      | No                       | No   |

ISDs: immunosuppressive drugs.
