# Supplementary material
Source: publisher figshare collection journal article supplement (https://karger.figshare.com/articles/dataset/_/5701864)
Supplement: Supplementary file 1 [file 1 › 485262sm_9.pdf]

**Table S4:** Corrected visual acuity measured with the LogMAR scale at baseline and at years 1 to 5, in a cohort of children and adolescents with autoimmune intermediate uveitis.

|                | Number of eyes | Median (IQR) LogMAR |
|----------------|----------------|---------------------|
| Baseline visit | 32             | 0.22 (0.00 to 0.46) |
| 1 year visit   | 28             | 0.10 (0.00 to 0.30) |
| 2 years visit  | 22             | 0.05 (0.00 to 0.40) |
| 3 years visit  | 19             | 0.05 (0.00 to 0.22) |
| 4 years visit  | 18             | 0.00 (0.00 to 0.30) |
| 5 years visit  | 17             | 0.05 (0.00 to 0.22) |

IQR: Interquartile range.
