# Supplementary material
Source: publisher figshare collection journal article supplement (https://karger.figshare.com/articles/dataset/_/5701864)
Supplement: Supplementary file 1 [file 1 › 485262sm_10.pdf]

**Table S5:** Comparison of the incidence rate of remission, relapse, and prolonged remission before or after 2005 in a cohort of children and adolescents with non infectious intermediate uveitis.

|                         | Before 2005      | After 2005       | Log-rank test<br>p-value |
|-------------------------|------------------|------------------|--------------------------|
| Remission               |                  |                  |                          |
| IR (95% CI)             | 14.7 [9.0-24.0]  | 26.1 [15.7-43.2] | 0.11                     |
| Episodes, n             | 16               | 15               |                          |
| Time at risk, eye-years | 109.0            | 57.6             |                          |
| Relapse                 |                  |                  |                          |
| IR (95% CI)             | 28.1 [14.1-56.2] | 36.3 [20.1-65.6] | 0.97                     |
| Episodes, n             | 8                | 11               |                          |
| Time at risk, eye-years | 28.5             | 30.3             |                          |
| Prolonged remission     |                  |                  |                          |
| IR (95% CI)             | 8.8 [4.4-17.5]   | 4.6 [1.7-12.2]   | 0.19                     |
| Episodes, n             | 8                | 4                |                          |
| Time at risk, eye-years | 91.3             | 87.2             |                          |

CI: Confidence interval; IR: incidence rate.
