# Supplementary material
Source: publisher figshare collection journal article supplement (https://karger.figshare.com/articles/dataset/_/5701864)

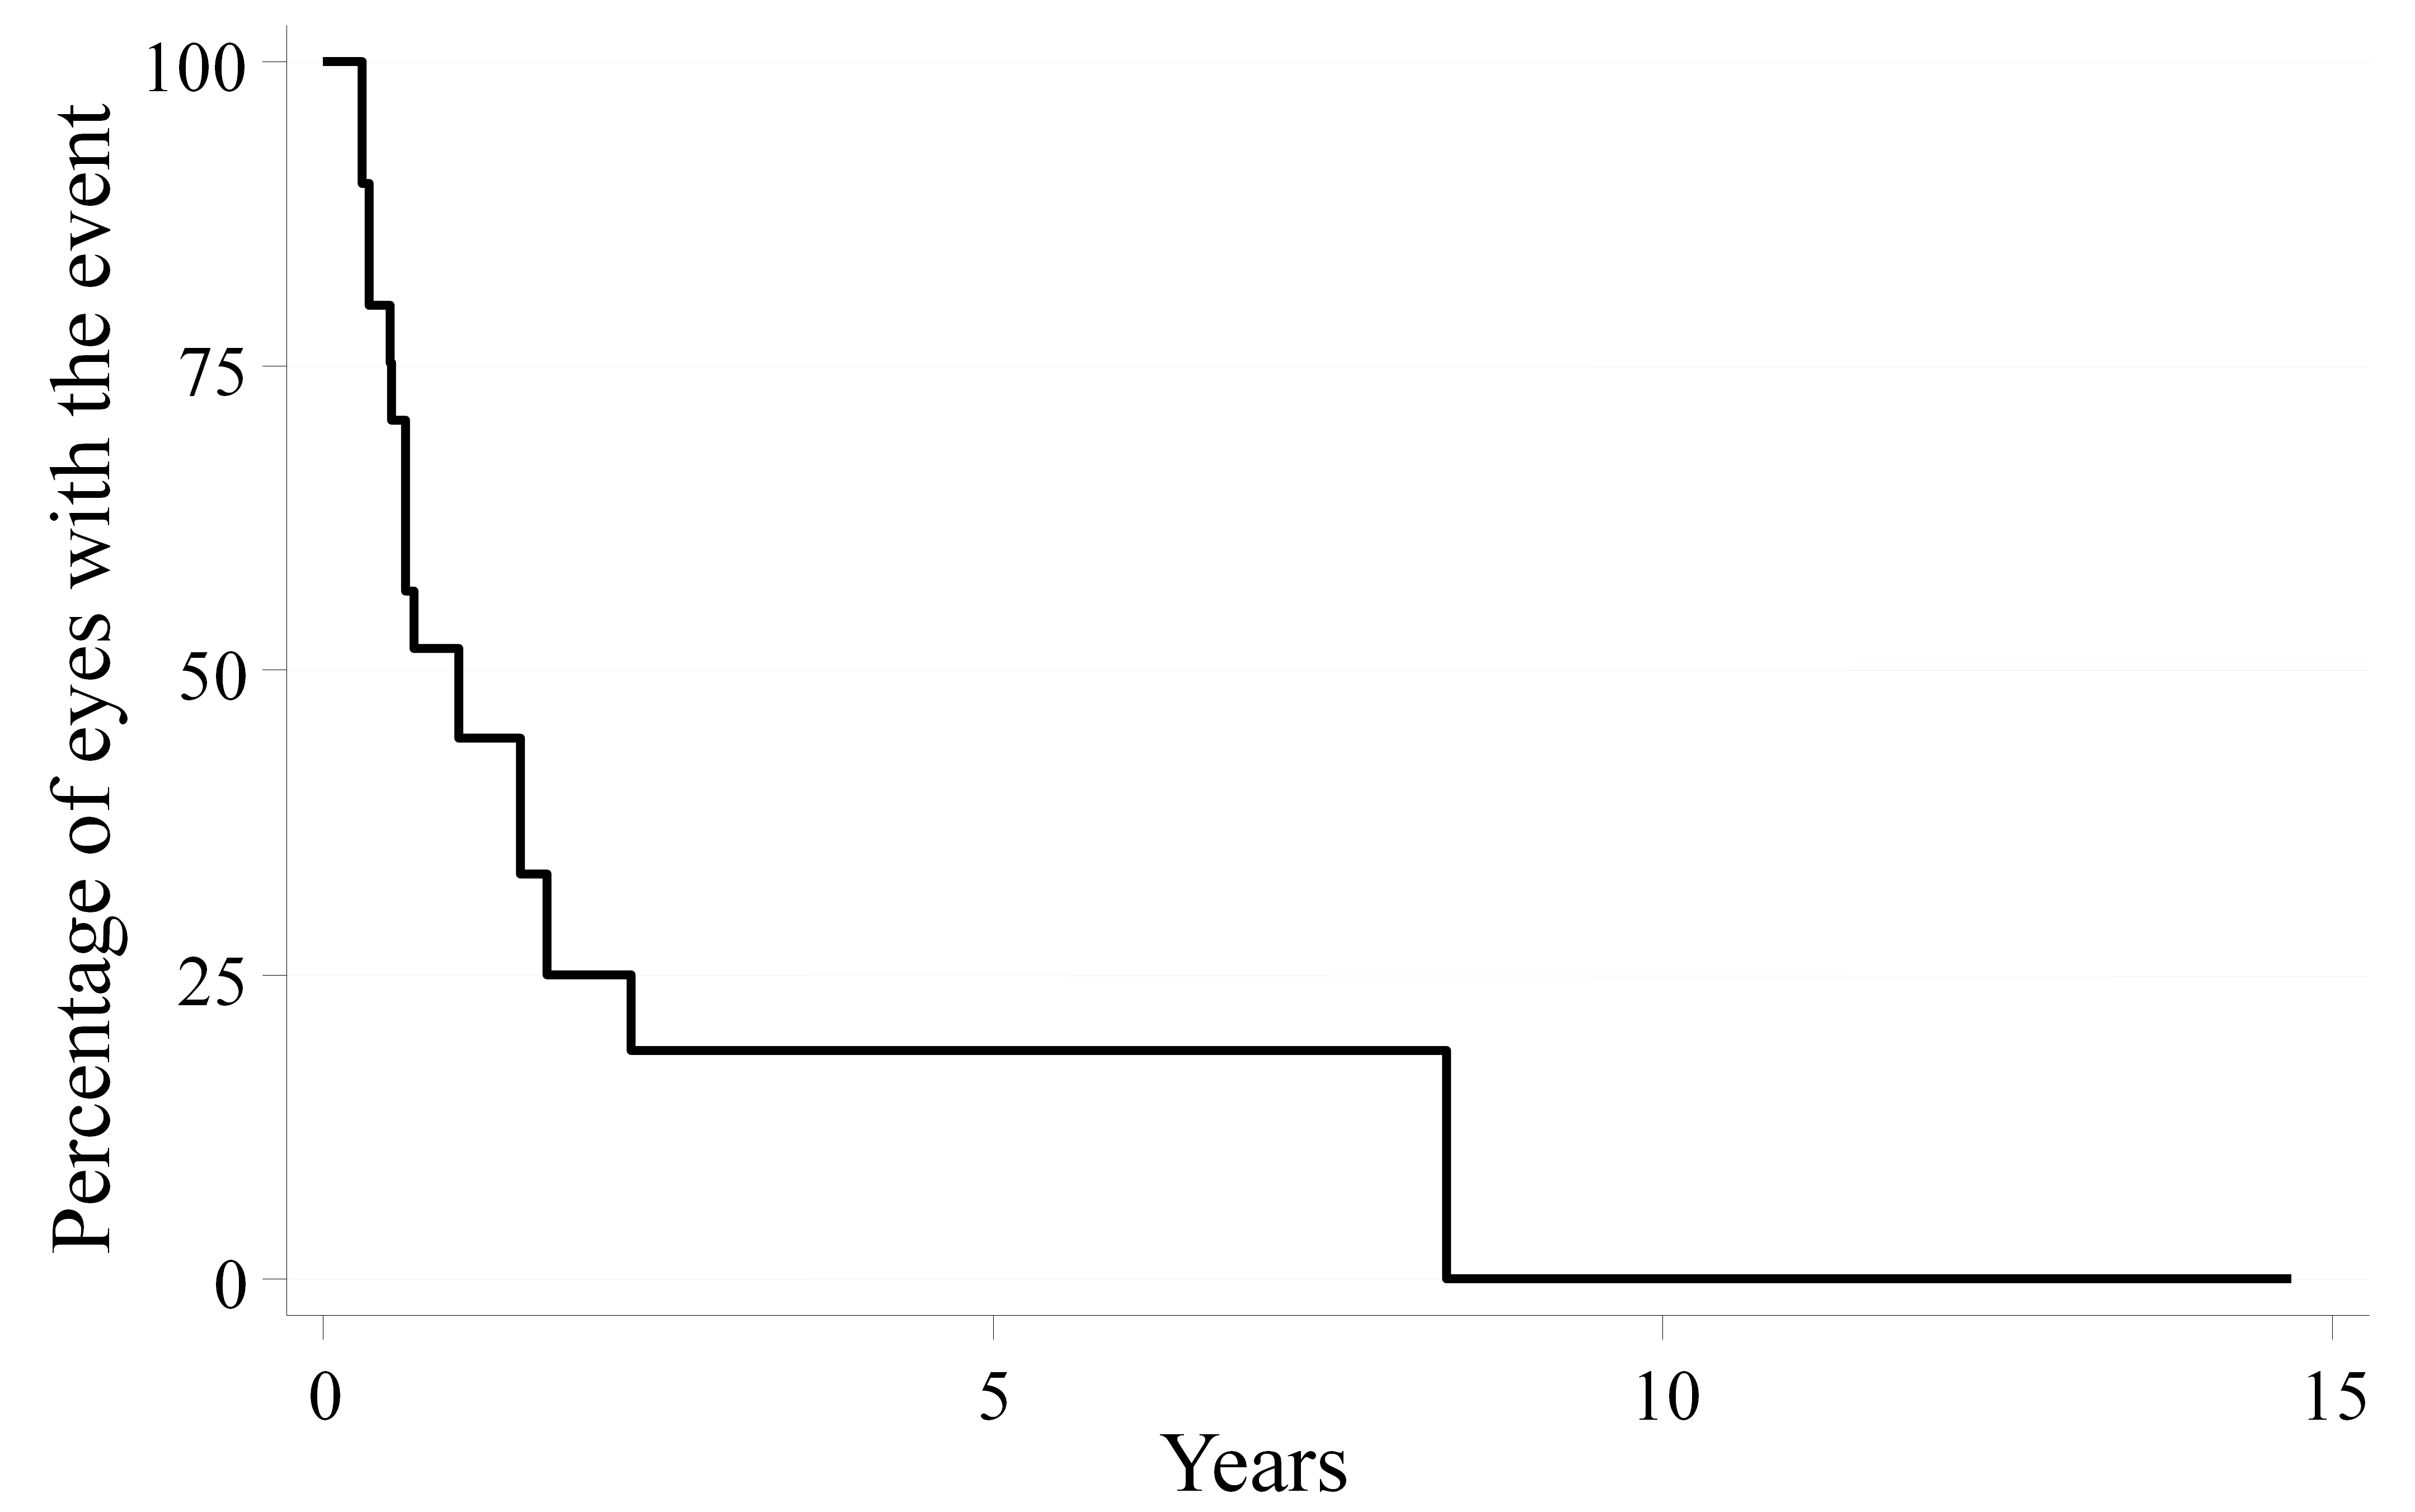

Supplement: Supplementary file 1 [file 1 › 485262sm_11.tif]
